# Supplementary material for: Defining animal welfare standards in hunting: body mass determines thresholds for incapacitation time and flight distance
Source: PubMed Central journal article supplement (PMC6137050; doi:10.1038/s41598-018-32102-0), 2018-09-13
Supplement: 41598_2018_32102_MOESM1_ESM.pdf [file 41598_2018_32102_MOESM1_ESM.pdf]

## SUPPLEMENTARY INFORMATION

Defining animal welfare standards in hunting: body mass determines thresholds for incapacitation time and flight distance

Sigbjørn Stokke<sup>1\*</sup>, Jon M. Arnemo<sup>2,3</sup>, Scott Brainerd<sup>4,5</sup>, Arne Söderberg<sup>6,7</sup>, Morten Kraabøl<sup>1,8</sup> & Bjørnar Ytrehus<sup>1</sup>

<sup>1</sup> Norwegian Institute for Nature Research, P.O. Box 5685 Torgard, NO-7485 Trondheim, Norway

<sup>2</sup> Inland Norway University of Applied Sciences, Campus Evenstad, Postboks 400, 2418 Elverum, Norway

<sup>3</sup> Department of Wildlife, Fish, and Environmental Studies, Swedish University of Agricultural Sciences, SE-90183 Umeå, Sweden

<sup>4</sup> Alaska Department of Fish and Game, Division of Wildlife Conservation, 1300 College Road, Fairbanks, AK 99701, USA

<sup>5</sup> Department of Ecology and Natural Resource Management, Norwegian University of Life Sciences, P.O. Box 5003, NO-1432 Ås, Norway

<sup>6</sup> National Veterinary Institute, SVA, SE-75189, Uppsala, Sweden

<sup>7</sup> County Administrative Board, Box 22067, 104 22 Stockholm, Sweden

<sup>8</sup> Multiconsult Norway AS, Postboks 265 Skøyen, NO-0213 Oslo, Norway

\* Corresponding author: email: [sigbjorn.stokke@nina.no](mailto:sigbjorn.stokke@nina.no) tlf: 0047 90270350

## **APPLIED CARTRIDGES, ORDERED BY FREQUENCY OF USE**

**(NOMENCLATURE OF CARTRIDGES ACCORDING TO BARNES 2000).**

| Cartridge             | Frequency |
|-----------------------|-----------|
| 308 Winchester        | 0.3528    |
| 30-06 Springfield     | 0.2625    |
| 6,5x55 Swedish Mauser | 0.1088    |
| 9.3x62mm Mauser       | 0.0859    |
| 7.62x53Rmm Russian    | 0.0272    |
| 338 Winchester Magnum | 0.0225    |
| 8x57mmJS Mauser       | 0.0171    |
| 308 Norma Magnum      | 0.0167    |
| 45-70 Government      | 0.0144    |
| 375 H&H Magnum        | 0.0134    |
| 9,3x57mm Mauser       | 0.0115    |
| 300 Winchester Magnum | 0.0091    |
| 7mm Remington Magnum  | 0.0080    |
| 270 Winchester        | 0.0064    |
| 9,3x74Rmm             | 0.0062    |
| 458 Winchester Magnum | 0.0045    |
| 8x57mmJ Mauser        | 0.0037    |
| 9,3x64mm Brenneke     | 0.0035    |
| 404 Jeffery           | 0.0023    |
| 338 Lapua Magnum      | 0.0021    |
| 444 Marlin            | 0.0017    |
| 358 Norma Magnum      | 0.0016    |

|                        |        |
|------------------------|--------|
| 358 Winchester         | 0.0014 |
| 300 Weatherby Magnum   | 0.0014 |
| 7x57Rmm Mauser         | 0.0014 |
| 6,5-284 Norma          | 0.0014 |
| 340 Weatherby Magnum   | 0.0012 |
| 8,2x53R Finnish        | 0.0012 |
| 7x64mm Brenneke        | 0.0012 |
| 7x57mm Mauser          | 0.0012 |
| 6,5x57mm Mauser        | 0.0012 |
| 35 Whelen              | 0.0010 |
| 416 Rigby              | 0.0008 |
| 375 Dakota             | 0.0006 |
| 416 Remington Magnum   | 0.0004 |
| 376 Steyr              | 0.0004 |
| 8x68mmS RWS            | 0.0004 |
| 300 H&H Magnum         | 0.0004 |
| 7mm-08 Remington       | 0.0004 |
| 460 Weatherby Magnum   | 0.0002 |
| 10,75x68mm Mauser      | 0.0002 |
| 416 Taylor             | 0.0002 |
| 378 Weatherby Magnum   | 0.0002 |
| 9,3x53Rmm Swiss        | 0.0002 |
| 338-06 JDJ             | 0.0002 |
| 338 Remington UltraMag | 0.0002 |
| 7,65x53mm Mauser       | 0.0002 |

|                          |        |
|--------------------------|--------|
| 7mm-300 Weatherby Magnum | 0.0002 |
| 270 Weatherby Magnum     | 0.0002 |
| 264 Winchester Magnum    | 0.0002 |
| 6.5-08 A-Square          | 0.0002 |
| 6,5-06                   | 0.0002 |
